# Supplementary material for: Ultrahigh SERS activity of the TiO2@Ag nanostructure leveraged for accurately detecting CTCs in peripheral blood
Source: Royal Society of Chemistry journal article supplement (doi:10.1039/d1bm01821c), 2022-01-01
Supplement: d1bm01821c1.pdf [file d1bm01821c1.pdf]

## Supplementary materials

### Ultrahigh SERS Activity of TiO<sub>2</sub>@Ag Nanostructure Leveraged for Accurately Detecting CTCs in Peripheral Blood

Yanping Xu,<sup>a,b,c†</sup> Dinghu Zhang,<sup>c†</sup> Jie Lin,<sup>b,d\*</sup> Xiaoxia Wu,<sup>b,c</sup> Xiawei Xu,<sup>b,d</sup> Ozioma  
Udochukwu Akakuru,<sup>b,d</sup> Hao Zhang,<sup>b,d</sup> Zhewei Zhang,<sup>c</sup> Yujiao Xie,<sup>b,d</sup> Aiguo Wu<sup>b,d\*</sup> &  
Guoliang Shao<sup>c\*</sup>

<sup>a</sup> Second clinical college, Zhejiang Chinese Medical University, Hang Zhou 310053, China.

<sup>b</sup> Cixi Institute of Biomedical Engineering, International Cooperation Base of Biomedical Materials Technology and Application, Chinese Academy of Science (CAS) Key Laboratory of Magnetic Materials and Devices & Zhejiang Engineering Research Center for Biomedical Materials, Ningbo Institute of Materials Technology and Engineering, CAS, 1219 ZhongGuan West Road, Ningbo 315201, China.

<sup>c</sup> Department of Interventional Radiology, The Cancer Hospital of the University of Chinese Academy of Sciences (Zhejiang Cancer Hospital), Institute of Basic Medicine and Cancer (IBMC), Chinese Academy of Sciences, Hangzhou 310022, China.

<sup>d</sup> Advanced Energy Science and Technology Guangdong Laboratory, Huizhou 516000, P.R. China.

\*Corresponding authors.

Email addresses:

linjie@nimte.ac.cn (Jie Lin)  
aiguo@nimte.ac.cn (Aiguo Wu)  
shaogl@zjcc.org.cn (Guoliang Shao)

† Y. Xu and D. Zhang contributed equally to this work.

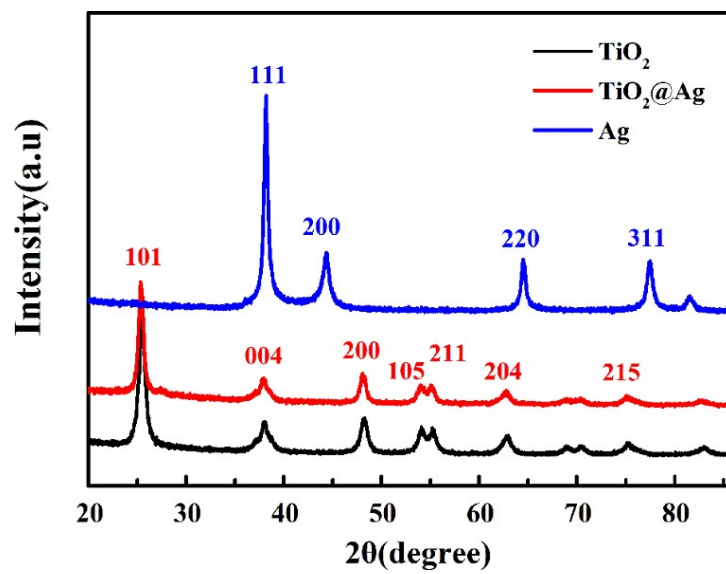

Fig. S1 X-ray diffraction (XRD) spectra of TiO<sub>2</sub>, TiO<sub>2</sub>@Ag, and Ag.

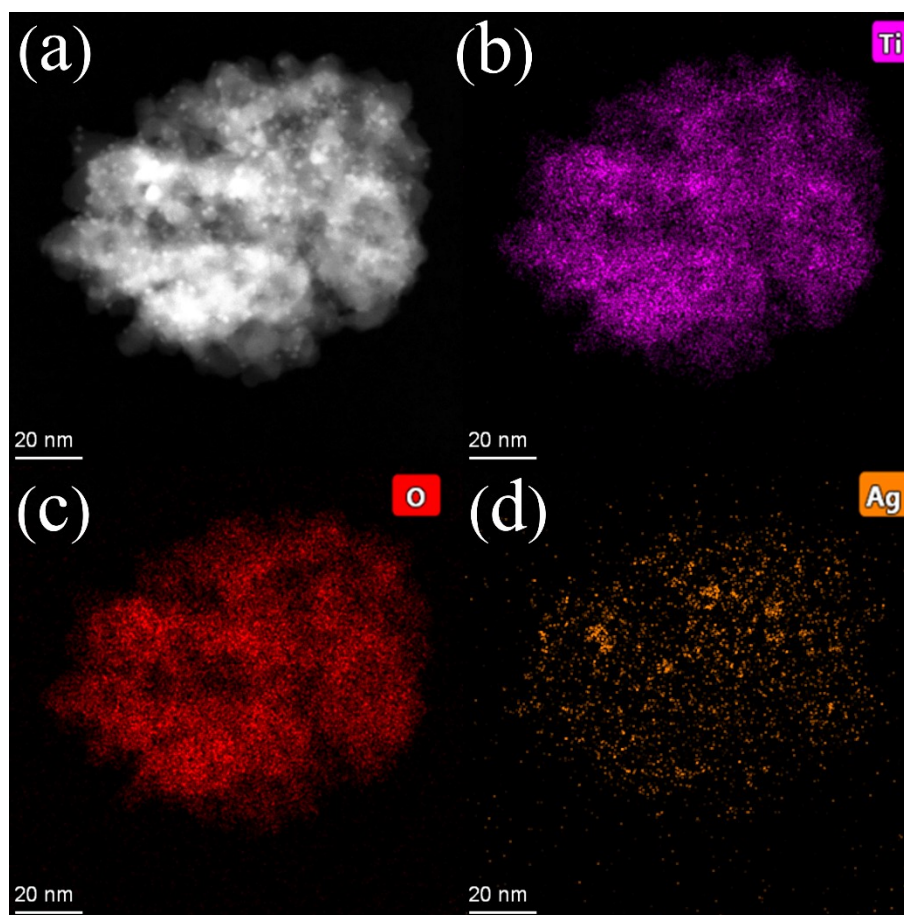

Fig. S2 Element distributions mapping images of Ti, O, and Ag in  $\text{TiO}_2@Ag$  nanostructures.

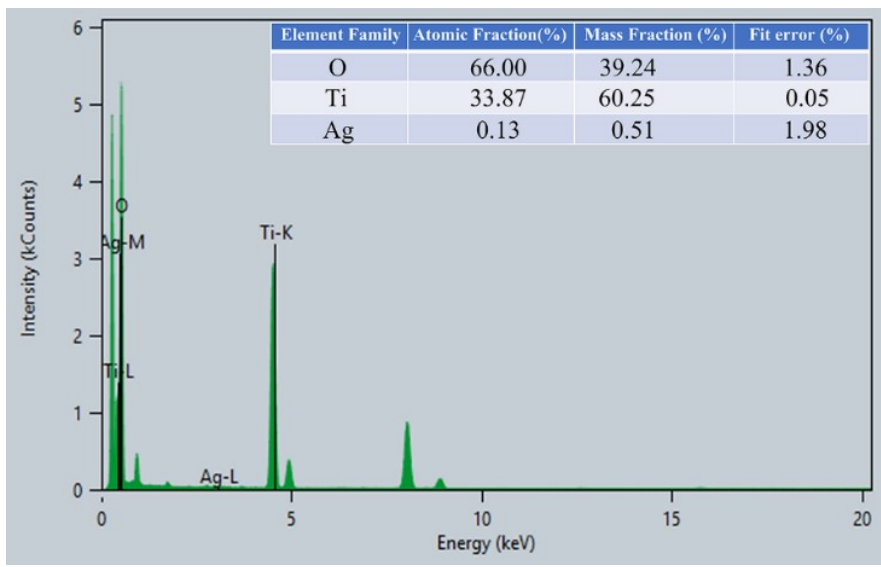

Fig. S3 Energy-dispersive spectroscopy (EDS) characterization of TiO<sub>2</sub>@Ag.

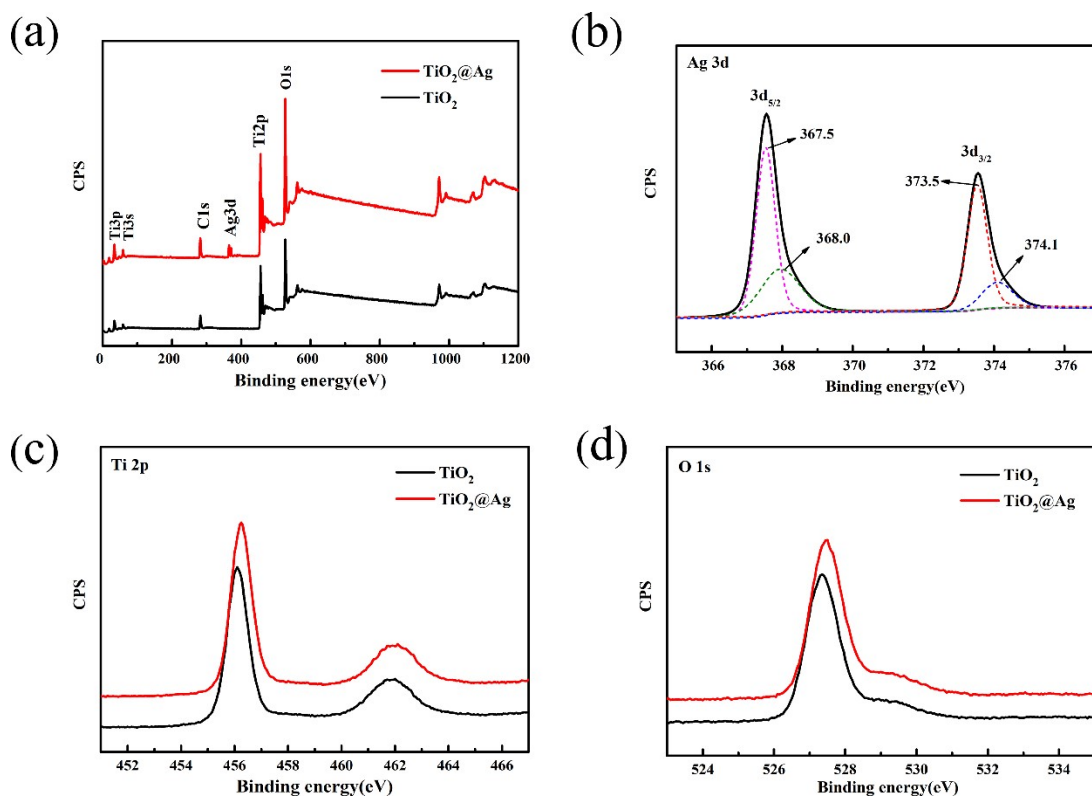

Fig. S4 XPS spectra of survey spectrum (a), Ag 3d (b), Ti 2p (c), and O 1s (d) of  $\text{TiO}_2$  and  $\text{TiO}_2@Ag$  samples, respectively.

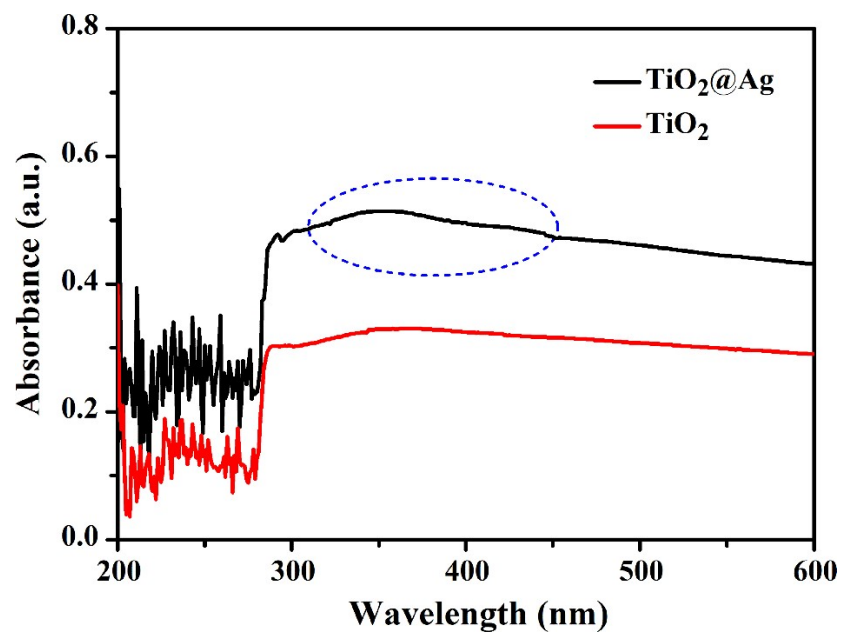

Fig. S5 UV-vis spectroscopy of  $\text{TiO}_2@Ag$ , and  $\text{TiO}_2$ .

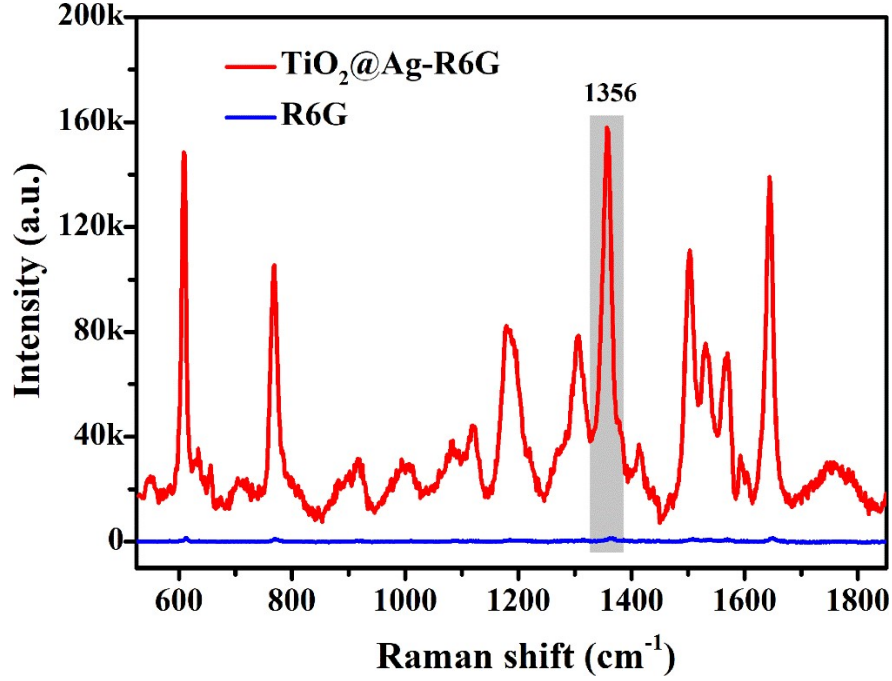

Fig. S6 Raman spectra of R6G molecule ( $5 \times 10^{-5}$  M) adsorbed on  $\text{TiO}_2@Ag$  NPs and pure SERS signal of R6G molecules ( $5 \times 10^{-2}$  M).

Enhancement factor (EF) calculation of  $\text{TiO}_2@Ag$  NPs was based on equation (1):

$$EF = (I_{\text{SERS}} / N_{\text{ads}}) / (I_{\text{bulk}} / N_{\text{bulk}}) \quad (1)$$

Where  $N_{\text{ads}}$  and  $N_{\text{bulk}}$  imply the number of R6G molecules adsorbed on the  $\text{TiO}_2@Ag$  NPs substrate and R6G molecules in normal Raman substrate, respectively.  $I_{\text{SERS}}$  and  $I_{\text{bulk}}$  are the vibration peak ( $1356 \text{ cm}^{-1}$ ) intensity of R6G molecules on  $\text{TiO}_2@Ag$  NPs substrate, and normal Raman spectrum of R6G molecules, respectively.

During the SERS experiment, 100  $\mu\text{L}$  of ethanol aqueous R6G solution ( $5 \times 10^{-2}$  M) was dried onto  $0.4 \text{ cm} \times 0.4 \text{ cm}^2$  silicon wafer.  $N_{\text{Raman}}$  was lied on equation (2).

$$N_{\text{bulk}} = 100 \mu\text{L} \times 5 \times 10^{-2} \text{ mol/L} \times 8 \times 6.02 \times 10^{23} \text{ mol}^{-1} \times 1.3 \mu\text{m}^2 / 0.16 \text{ cm}^{-2} \quad (2)$$

where  $d$  is the diameter of the light spot estimated as  $d = 1.22 \lambda/\text{NA}$ ,  $\lambda$  is incident wavelength 532 nm, the numerical aperture of the objective lens  $N_A = 0.5$ , the laser spot is  $\sim 1.3 \mu\text{m}^2$ . On the basis of equation (2),  $N_{\text{bulk}}$  was estimated as  $\sim 1.95 \times 10^{12}$ .

In addition,  $N_{\text{ads}}$  is synergistically determined by laser spot illuminating the  $\text{TiO}_2@\text{Ag}$ -R6G substrate, and the density of R6G molecules,  $N_{\text{ads}}$  is concluded as:

$$N_{\text{ads}} = \sigma \times 1.3 \mu\text{m}^2 \times 6.02 \times 10^{23} \text{ mol}^{-1} \quad (3)$$

Where  $\sigma$  is the density of R6G molecule absorbed onto  $\text{TiO}_2@\text{Ag}$  substrate, which is approximated to  $\sim 0.5 \text{ nM cm}^{-2}$ (3).  $N_{\text{ads}}$  is concluded as  $\sim 3.91 \times 10^6$ .  $I_{\text{SERS}}$  is the Raman peak intensity at  $1356 \text{ cm}^{-1}$  of R6G molecules on  $\text{TiO}_2@\text{Ag}$  NPs, while  $I_{\text{bulk}}$  represents the Raman peak intensity at  $1356 \text{ cm}^{-1}$  of pure R6G molecule (fig S6).  $I_{\text{SERS}} = \sim 135065$  and  $I_{\text{bulk}} = \sim 882$ . Substituting these values into equation (1), EF of  $\text{TiO}_2@\text{Ag}$  NPs was concluded to be  $\sim 7.61 \times 10^7$ .



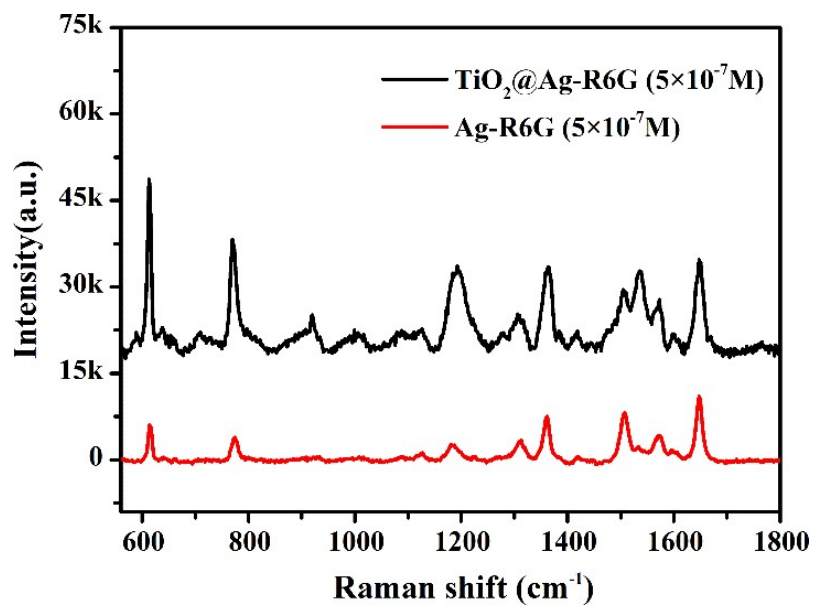

Fig. S7 SERS signal of R6G ( $5 \times 10^{-7} \text{ M}$ ) molecule adsorbed on  $\text{TiO}_2@Ag$  nanostructure, and Ag NPs.

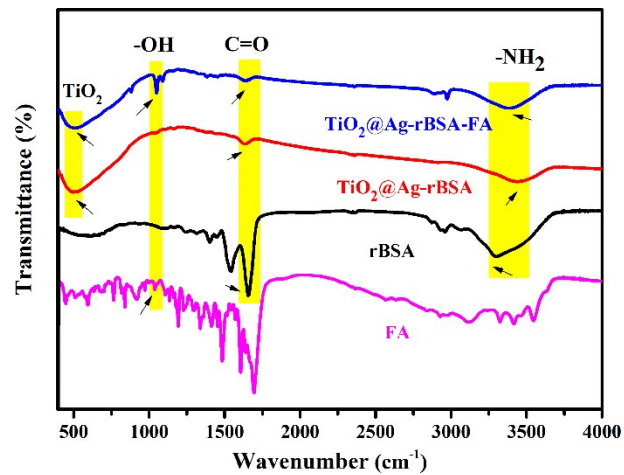

Fig. S8 FT-IR spectra of FA, rBSA, TiO<sub>2</sub>@Ag-rBSA, and TiO<sub>2</sub>@Ag-rBSA-FA.

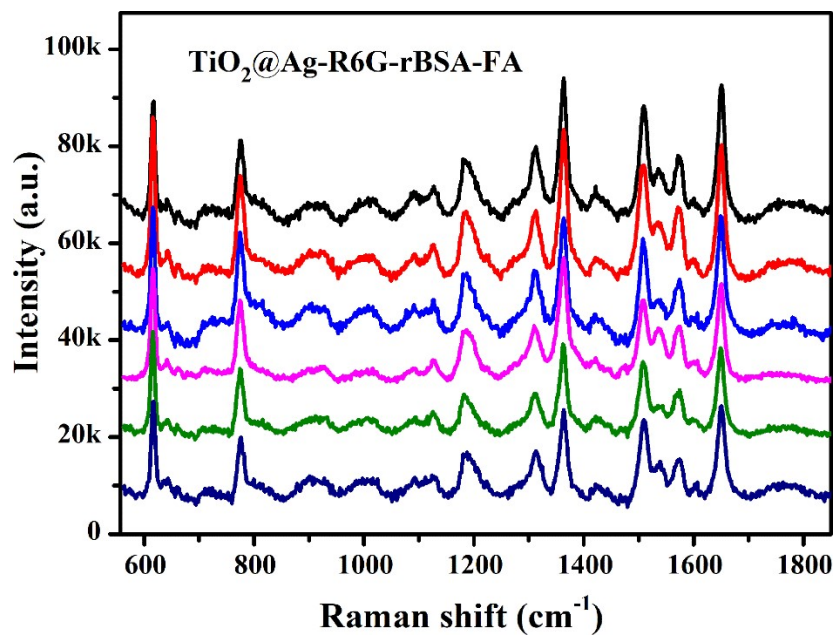

Fig. S9 SERS spectra of R6G ( $5 \times 10^{-3}$  M) molecule collected from six TiO<sub>2</sub>@Ag-rBSA-FA SERS bioprobes; Excitation wavelength: 532 nm; Laser power: 0.1 mW; Lens: 50× objective; Accumulations: 10 s.

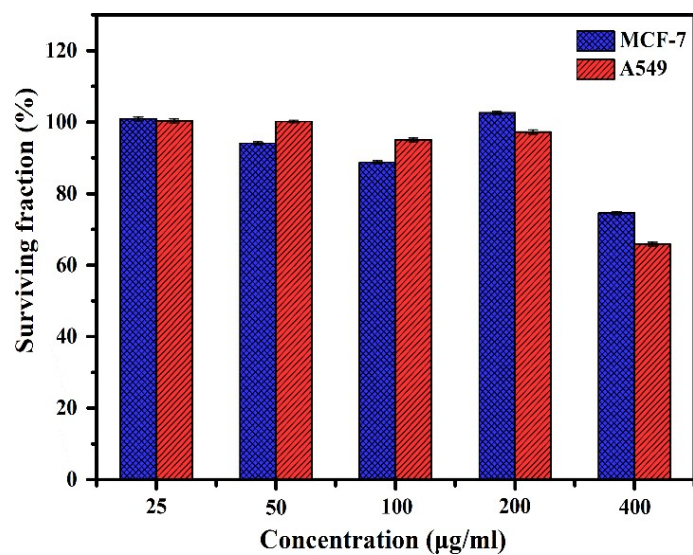

Fig. S10 Cell viability of A549 and MCF-7 cells co-incubated with  $\text{TiO}_2@\text{Ag-R6G-rBSA-FA}$  bioprobe for 24 h with different  $\text{TiO}_2@\text{Ag}$  concentrations.

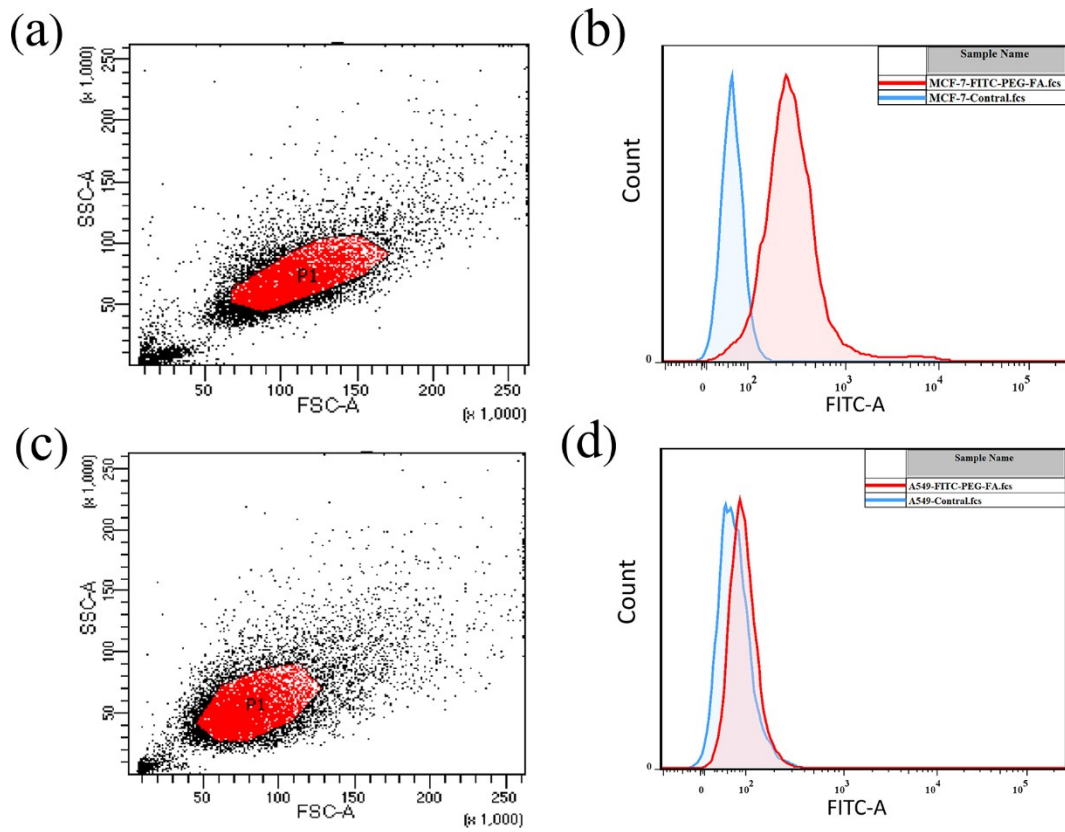

Fig. S11 FCS analysis of MCF-7 and A549 cells incubated with 20  $\mu$ L FA-PEG-FITC (red) and PBS (blue).

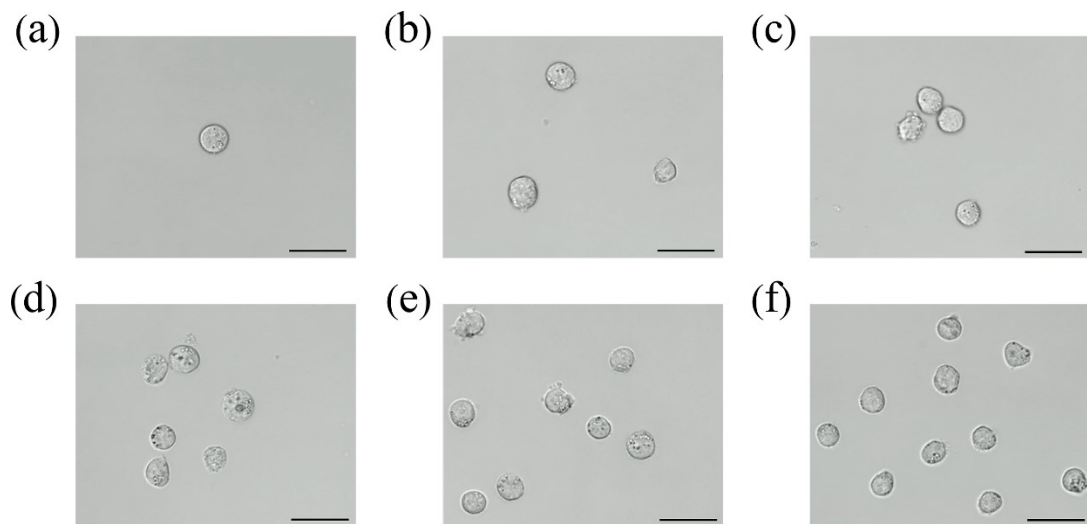

Fig. S12 HeLa cell count of bright field under laser scanning confocal microscope.

Scale bar: 25  $\mu\text{m}$ .

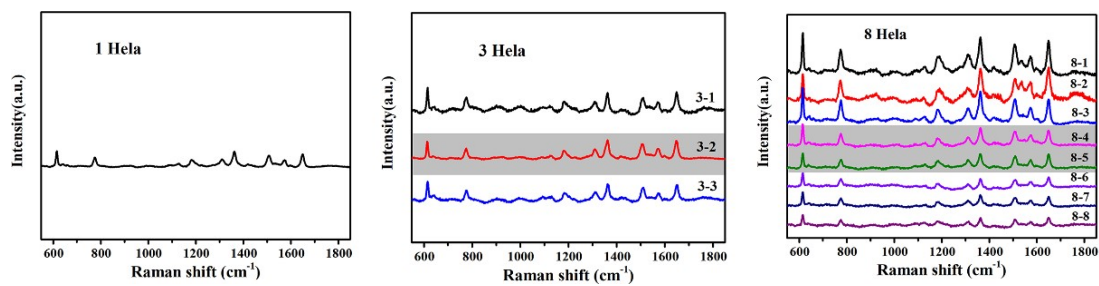

Fig. S13 Detection sensitivity of the TiO<sub>2</sub>@Ag-R6G-rBSA-FA SERS bioprobe for different numbers of HeLa cells in the rabbit blood.

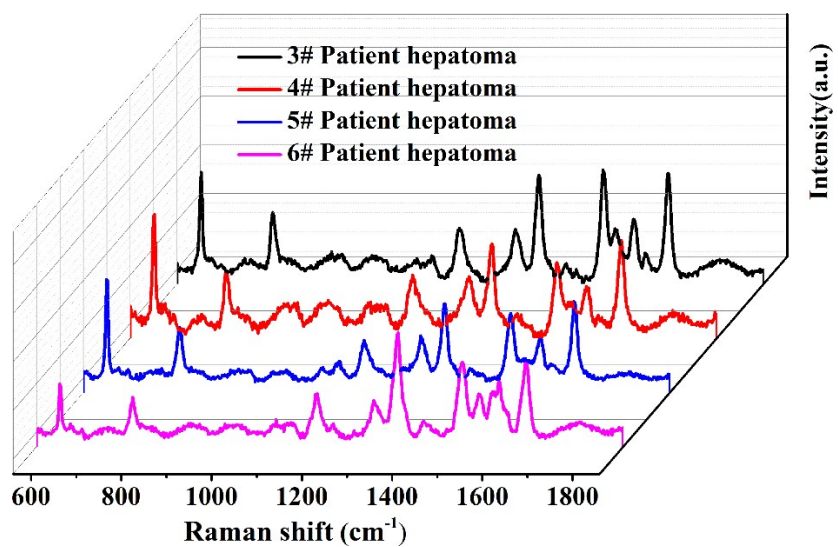

Fig. S14  $\text{TiO}_2@\text{Ag-R6G-rBSA-FA}$  SERS bioprobe was utilized for CTCs detection in peripheral blood of four liver cancer patients.
